# Supplementary material
Source: PubMed Central journal article supplement (PMC4576068)
Supplement: AAC.01218-15_zac010154459so1.pdf [file AAC.01218-15_zac010154459so1.pdf]

## Figure Legends

**Figure S1:** Amplified fragment length polymorphism analysis showing genotypic diversity among 24 clinical and environmental global *Exserohilum* isolates. The dendrogram was constructed by using UPGMA (unweighted pair group method with arithmetic mean) in combination with the Pearson correlation coefficient and was restricted to fragments of 60-400 bp. Scale bar indicates the percentage similarity.

**Figure S2:** Phylogram of 24 isolates of species of *Exserohilum* strains based on rDNA ITS sequences using maximum likelihood with the MEGA v6 software, with partial deletion of gaps and using the Kimura-2 parameter substitution model. *Curvularia heteropogoncola* was used as outgroup and *Exserohilum* isolates with a "T" are ex-type. Branch support values are indicated by the numbers near the branches.

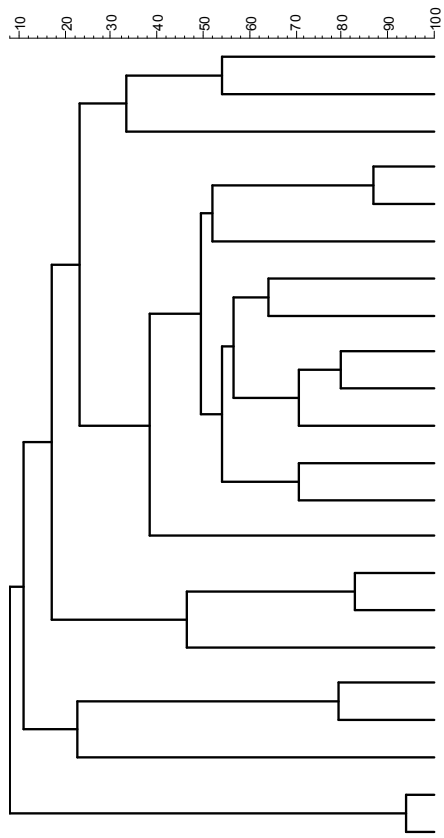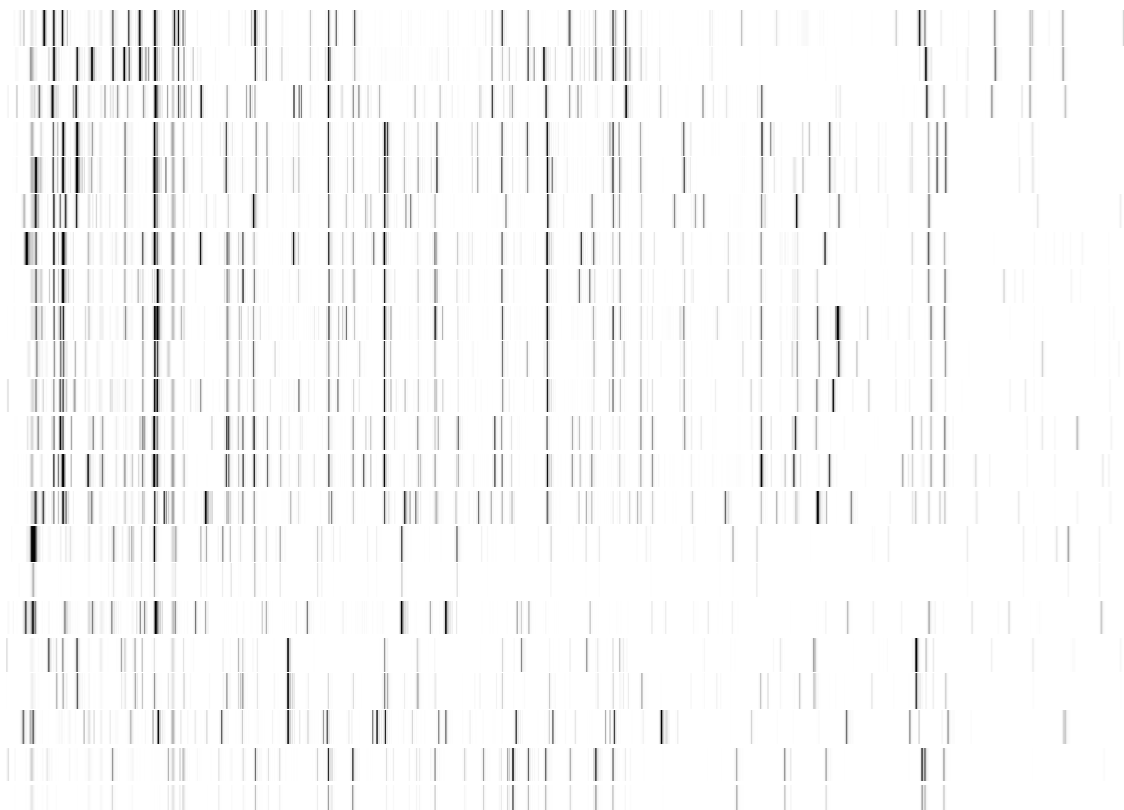

- CBS 128053 *Exserohilum holmii*
- CBS 505.90 *Exserohilum curvatum*
- CBS 128064 *Exserohilum sp.*
- CBS 128058 *Exserohilum prolatum*
- CBS 128059 *Exserohilum prolatum*
- CBS 412.93 *Exserohilum antillanum*
- CBS 112815 *Exserohilum rostratum*
- CBS 325.87 *Exserohilum macginnisii*
- CBS 128061 *Exserohilum rostratum*
- CBS 120308 *Exserohilum macginnisii*
- CBS 131565 *Exserohilum rostratum*
- CBS 128062 *Exserohilum rostratum*
- CBS 128063 *Exserohilum rostratum*
- CBS 128060 *Exserohilum rostratum*
- CBS 322.64 *Exserohilum pedicellatum*
- CBS 375.76 *Exserohilum pedicellatum*
- CBS 132709 *Exserohilum fusiforme*
- CBS 297.80 *Exserohilum gedarefense*
- CBS 504.90 *Exserohilum gedarefense*
- CBS 132710 *Exserohilum protrudens*
- CBS 132832 *Exserohilum neoregeliae*
- CBS 132833 *Exserohilum neoregeliae*

Fig. S2

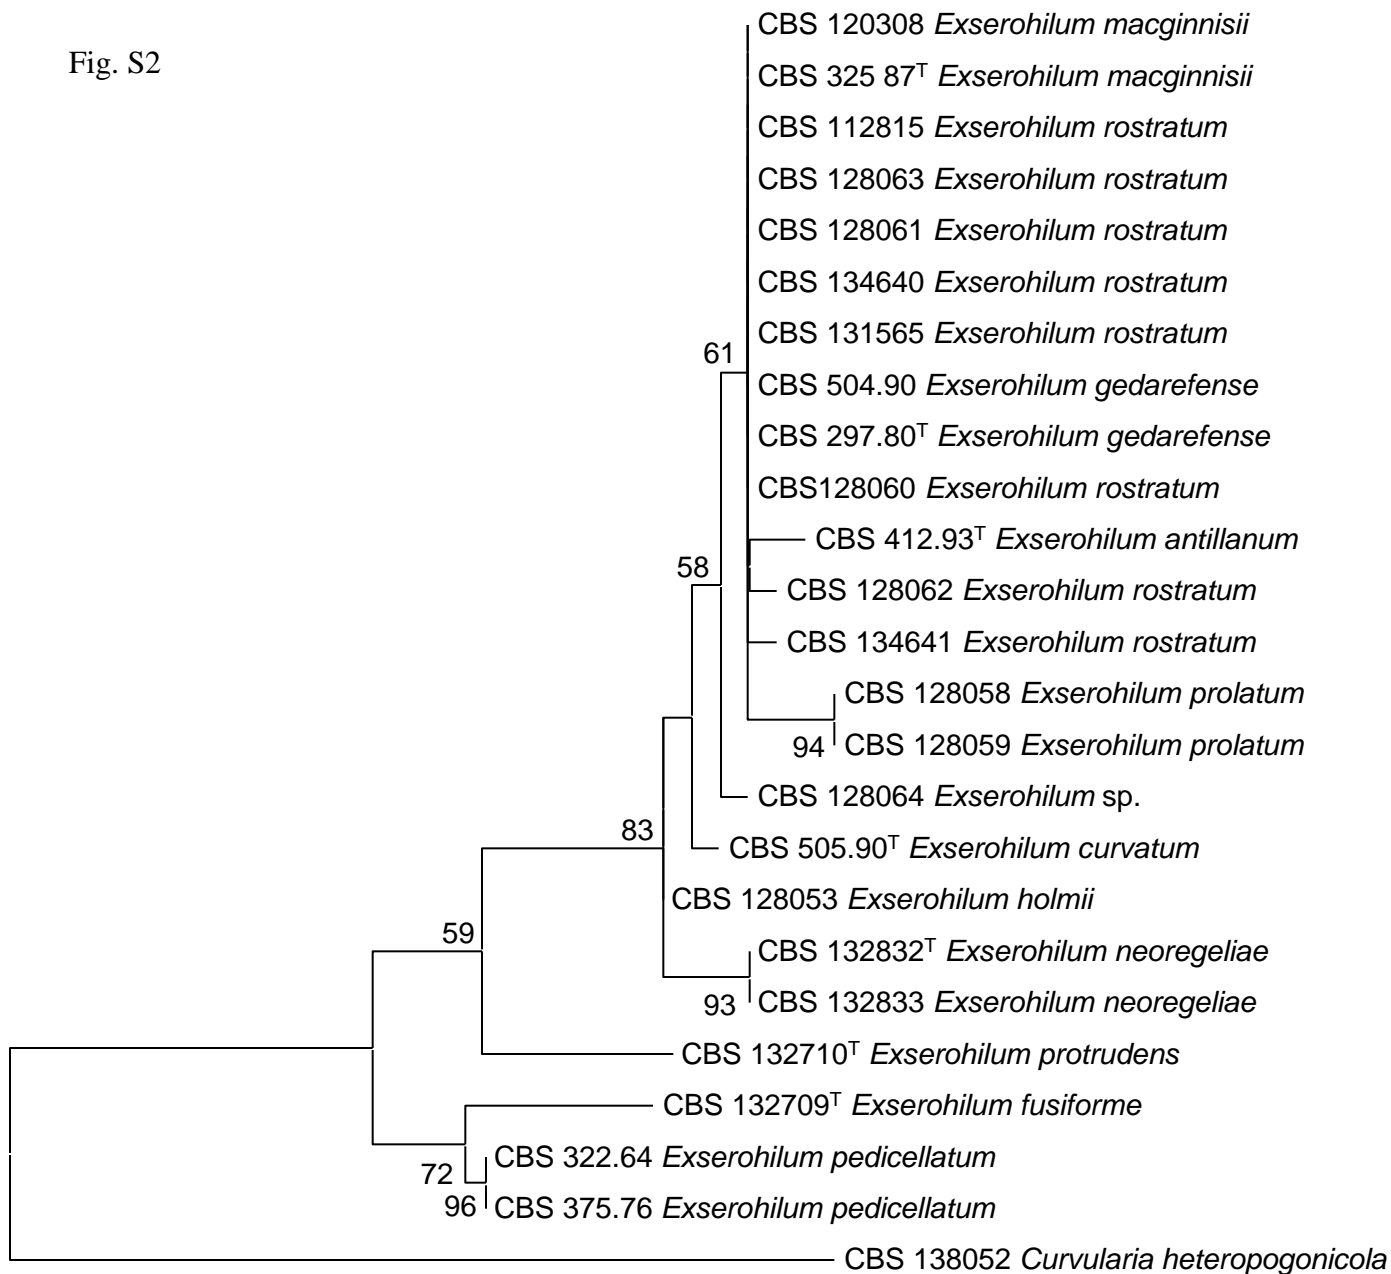

0.01
